# Supplementary material
Source: publisher site journal article supplement (https://www.dovepress.com/get_supplementary_file.php?f=139687.xlsx)
Supplement: Supplementary file 1 [file get_supplementary_file.php]

## Sheet: Publ. available pre-clin data
Supplementary material 1
for
Nanomedicinal products: a survey on specific toxicity and side effects
Walter Brand1*, Cornelle W. Noorlander1*, Christina Giannakou2,3, Wim H. de Jong2, Myrna W. Kooi1, Margriet V.D.Z. Park2, Rob J. Vandebriel2, Irene E.M. Bosselaers4, Joep H.G. Scholl5, Robert E. Geertsma2
1 Centre for Safety of Substances and Products, National Institute for Public Health and the Environment (RIVM), Bilthoven, the Netherlands.
2 Centre for Health Protection, National Institute for Public Health and the Environment (RIVM), Bilthoven, the Netherlands.
3 Department of Toxicogenomics, Maastricht University, Maastricht, the Netherlands.
4 Section Pharmacology, Toxicology and Pharmacokinetics, Medicines Evaluation Board (CBG-MEB), Utrecht, the Netherlands.
5 Research & Analysis Department, Netherlands Pharmacovigilance Centre Lareb, ‘s-Hertogenbosch, the Netherlands.
* These authors contributed equally to the work.
Toxicity data
PRODUCT			TOXICITY ENDPOINTS*							REFERENCES
ID Nr. (#)	Product name **	active substance	Acute Tox (single dose)	Sub-acute Tox (multiple dose)	Genotoxicity	Carcinogenicity	Reproductive Toxicity	Developmental Toxicity	Immunotoxicity	Source						Internet adress
1	ABRAXANE	paclitaxel	Positive	Positive	Not performed (mutagen)	Not performed	Positive	Positive	Positive	Assessment report for Abraxane, EMEA, 2007. Doc.Ref.:EMEA/47053/2008.						http://www.ema.europa.eu/docs/en_GB/document_library/EPAR_-_Public_assessment_report/human/000778/WC500020433.pdf
2	RAPAMUNE	sirolimus	Positive; Low	Positive	Negative (in vitro / in vivo)	Positive	Positive	Positive	Not reported	Scientific discussion, EMEA, 2005.						http://www.ema.europa.eu/docs/en_GB/document_library/EPAR_-_Scientific_Discussion/human/000273/WC500046434.pdf
3	CAELYX	doxorubicin hydrochloride	Not performed (doxorubicin)	Positive	Not performed (mutagen)	Not performed (carcinogen)	Not performed (reprotoxic)	Positive	Not reported	Scientific discussion, EMEA, 2005.						http://www.ema.europa.eu/docs/en_GB/document_library/EPAR_-_Scientific_Discussion/human/000089/WC500020175.pdf
4	MYOCET	doxorubicin hydrochloride	Positive	Positive	Not performed (mutagen)	Not performed (carcinogen)	Not performed (reprotoxic)	Not performed (teratogenic)	Not reported	Scientific discussion, EMEA, 2005.						http://www.ema.europa.eu/docs/en_GB/document_library/EPAR_-_Scientific_Discussion/human/000297/WC500031808.pdf
5	MEPACT	mifamurtide	Positive	Positive	Negative (in vitro / in vivo)	Not performed	Not performed	Positive	Not reported	Assessment report for Mepact, EMEA, 2009. EMEA/CHMP/635781/2008.						http://www.ema.europa.eu/docs/en_GB/document_library/EPAR_-_Public_assessment_report/human/000802/WC500026564.pdf
7	RIENSO	ferumoxytol	Positive; Low	Positive	Negative (in vitro / in vivo)	Not performed	Positive	Positive	Positive	CHMP assessment report Rienso, EMA, 2012. EMA/CHMP/221776/2012.						http://www.ema.europa.eu/docs/en_GB/document_library/EPAR_-_Public_assessment_report/human/002215/WC500129751.pdf
9	VISUDYNE	verteporfin	Positve	Positive	Positive (in some in vitro assays and in vivo assay (all in the presence of light))	Not performed	Negative	Negative	Not reported	Scientific discussion, EMEA, 2004.						http://www.ema.europa.eu/docs/en_GB/document_library/EPAR_-_Scientific_Discussion/human/000305/WC500052403.pdf
10	EMEND	aprepitant	Positive; Low	Positive; Low	Negative	Positive	Negative	Negative	Not performed	Scientific discussion, EMEA, 2004.						http://www.ema.europa.eu/docs/en_GB/document_library/EPAR_-_Scientific_Discussion/human/000527/WC500026534.pdf
11	NEULASTA	pegfilgrastim	Positive; Low	Positive	Not performed	Not performed	Negative	Negative	Not performed	Scientific discussion, EMEA, 2004.						http://www.ema.europa.eu/docs/en_GB/document_library/EPAR_-_Scientific_Discussion/human/000420/WC500025941.pdf
12	MACUGEN	pegaptanib sodium	Positive; Low	Positive; Low	Negative (in vitro / in vivo)	Not performed	Negative	Positive	Not performed	Scientific discussion, EMEA, 2006.						http://www.ema.europa.eu/docs/en_GB/document_library/EPAR_-_Scientific_Discussion/human/000620/WC500026218.pdf
13	ALIMTA	pemetrexed disodium	Positive; Low	Positive	Positive in vivo; negative in vitro	Not performed	Positive	Positive	Not reported	Scientific discussion, EMEA, 2004.						http://www.ema.europa.eu/docs/en_GB/document_library/EPAR_-_Scientific_Discussion/human/000564/WC500025606.pdf
14	DEPOCYT	cytarabine	Positive; Low	Positive; Low	Positive (in vitro / in vivo)	Not performed (carcinogen)	Not performed (reprotoxic)	Not performed (teratogenic)	Not reported	Scientific discussion, EMEA, 2005						http://www.ema.europa.eu/docs/en_GB/document_library/EPAR_-_Scientific_Discussion/human/000317/WC500035646.pdf
25	RENAGEL	sevelamer hydrochloride	Positive; Low	Positive; Low	Negative (in vitro / in vivo)	Not performed	Positive	Not reported	Not reported	Scientific discussion, EMEA, 2005.						http://www.ema.europa.eu/docs/en_GB/document_library/EPAR_-_Scientific_Discussion/human/000254/WC500052253.pdf
26	PEGASYS	peginterferon alfa-2a	Positive	Positive; Low	Negative (in vitro)	Not performed	Not performed (reprotoxic)	Not reported	Not reported	Scientific discussion, EMEA, 2005.						http://www.ema.europa.eu/docs/en_GB/document_library/EPAR_-_Scientific_Discussion/human/000395/WC500039192.pdf
27	SOMAVERT	pegvisomant	Positive; Low	Positive; Low	Negative (in vitro)	Not performed (carcinogen?)	Negative	Not peformed (reference to GH)	Positive	Scientific discussion, EMEA, 2004.						http://www.ema.europa.eu/docs/en_GB/document_library/EPAR_-_Scientific_Discussion/human/000409/WC500054625.pdf
28	MIRCERA	methoxy-polyethylene glycol epoetin beta	Positive	Positive	Not performed	Not performed	Negative	Negative	Not performed	Scientific discussion, EMEA, 2007.						http://www.ema.europa.eu/docs/en_GB/document_library/EPAR_-_Scientific_Discussion/human/000739/WC500033669.pdf
29	PEGINTRON	peginterferon alfa-2B	Positive; Low	Positive	Negative (in vitro)	Not performed	Not performed (reprotoxic)	Negative	Not reported	Scientific discussion, EMEA, 2005.						http://www.ema.europa.eu/docs/en_GB/document_library/EPAR_-_Scientific_Discussion/human/000280/WC500039385.pdf
30	INVEGA	paliperidone	Positive	Positive	Negative (in vitro / in vivo)	Positive	Negative	Negative	Not performed	Scientific discussion, EMEA, 2007.						http://www.ema.europa.eu/docs/en_GB/document_library/EPAR_-_Scientific_Discussion/human/000746/WC500034928.pdf
32	LUMIREM	ironoxide	No data	No data	No data	No data	No data	No data	No data	-						-
33	ENDOREM	ironoxide	No data	No data	No data	No data	No data	No data	No data	-						-
36	TAXOTERE	docetaxel	Positive	Not reported	Positive	Not performed	Positive	Positive	Not reported	Scientific discussion, EMEA, 2005.						http://www.ema.europa.eu/docs/en_GB/document_library/EPAR_-_Scientific_Discussion/human/000073/WC500035260.pdf
42	CANCIDAS	caspofungin acetate	Positive	Positive	Negative (in vitro / in vivo)	Not performed	Negative	Negative	Not performed	Scientific discussion, EMEA, 2004.						http://www.ema.europa.eu/docs/en_GB/document_library/EPAR_-_Scientific_Discussion/human/000379/WC500057186.pdf
44	NEORAL	ciclosporine	No data	No data	Negative (in vitro / in vivo)	Positive	Not reported	Negative	Not reported	Annex II, Scientific conclusions and grounds for the variation to the terms of the marketing authorization.						http://ec.europa.eu/health/documents/community-register/2013/20130925126612/anx_126612_en.pdf
45	RISPERDAL CONSTA	risperidone	No data	Positive	Not performed	Positive	Negative	Negative	Not reported	Annex II Scientific conclusions and grounds for the amendment of the summaries of product characteristics, labelling and package leaflet presented by the EMAA, EMEA.						http://www.ema.europa.eu/docs/en_GB/document_library/Referrals_document/Risperdal_Consta_30/WC500008170.pdf
46	AMBISOME	amphotericin b	Positive	Positive	Not reported	Not reported	Positive	Negative	Not reported	FDA, Center for Drug Evaluation and Research, 1997. Application number 050740.						http://www.accessdata.fda.gov/drugsatfda_docs/nda/97/050740a_081797-4.pdf
47	VENOFER	ferrioxidesaccharaat	Positive	Positive	Negative (in vitro / in vivo)	Not performed	Negative	Negative	Not reported	Luitpold Pharmaceuticals, Inc. Product Monograph VENOFER. January 15, 2013.						http://www.luitpold.com/documents/22.pdf
48	ABELCET	amphotericin b	No data	No data	No data	No data	No data	No data	No data	-						-
49	ELOXATIN	oxaliplatin	No data	No data	No data	No data	No data	No data	No data	-						-
50	DAUNOXOME	daunorubicin citrate	No data	No data	No data	No data	No data	No data	No data	-						-
29 products in total
	* Positive = effect; Negetive = no effect
	** Note the product brand names are registered trademarks.
This documant contains the Supplementary material 1 for:
Brand W, Noorlander CW, Giannakou C, de Jong WH, Kooi MW, Park MVDZ, Vandebriel RJ, Bosselaers IEM, Scholl JHG, Geertsma RE. Nanomedicinal products: a survey on specific toxicity and side effects. International Journal of Nanomedicine, accepted manuscript.
